# Supplementary material for: The winter holidays are glorious—except when they’re not
Source: PubMed Central journal article supplement (PMC11624255; doi:10.1038/s44319-024-00318-z), 2024-11-11
Supplement: 44319_2024_318_MOESM1_ESM.pdf [file 44319_2024_318_MOESM1_ESM.pdf]

# The Winter Holidays Are Glorious - Except When They're Not

Shina Caroline Lynn Kamerlin

*Corresponding author(s): Shina Caroline Lynn Kamerlin (skamerlin3@gatech.edu)*

---

## Review Timeline:

Submission Date:

21st Oct 24

Accepted:

4th Nov 24

---

*Editor: Holger Breithaupt*

**Transaction Report:** This article type is not peer reviewed.
